# Supplementary material for: Hydroxychloroquine is associated with lower seroconversion upon 17DD-Yellow fever primovaccination in patients with primary Sjögren’s syndrome
Source: PubMed Central journal article supplement — Hum Vaccin Immunother. 2024 Jul 3;20(1):2318814. doi: 10.1080/21645515.2024.2318814 (PMC11225917; doi:10.1080/21645515.2024.2318814), 2024-07-03
Supplement: KHVI_A_2318814_SM0710.pdf [file KHVI_A_2318814_SM0710.pdf]

## **SUPPLEMENTARY MATERIAL**

### **Hydroxychloroquine is associated with lower seroconversion upon 17DD-Yellow**

#### **Fever primovaccination in patients with primary Sjögren's Syndrome**

Ketty Lysie Libardi Lira Machado\*, Ismael Artur da Costa-Rocha\*, Laura Gonçalves Rodrigues Aguiar, Isac Ribeiro Moulaz, Samira Tatiyama Miyamoto, Priscila Costa Martins, Erica Vieira Serrano, Ana Paula Espíndula Gianordoli, Maria da Penha Gomes Gouvea, Maria de Fatima Bissoli, Sheila Maria Barbosa de Lima, Waleska Dias Schwarcz, Adriana de Souza Azevedo, Juliana Fernandes Amorim da Silva, Renata Tourinho Santos, Joaquim Pedro Brito-de-Sousa, Jordana Grazziela Coelho-dos-Reis, Ana Carolina Campi-Azevedo, Andréa Teixeira-Carvalho, Vanessa Peruhype-Magalhães, Francieli Fontana Sutile Tardetti Fantinato, Licia Maria Henrique da Mota, Olindo Assis Martins-Filho<sup>#§</sup> and Valéria Valim<sup>#§</sup>

\* These authors contributed equally to this study.

# These authors share the senior authorship.

§ Corresponding authors

**Supplementary Table S1.** Adverse events post 17DD-YF primovaccination in patients with primary Sjögren's Syndrome categorized according to the use of HCQ immunotherapy

| Adverse Events           | pSS subgroups        |                     |                      |
|--------------------------|----------------------|---------------------|----------------------|
|                          | Non-HCQ<br>(n=18)    | HCQ<br>(n=16)       | <i>p value</i>       |
| <b>Local % (n)</b>       | 33 (6)               | 31 (5)              | >0.9999              |
| Pain                     | 28 (5)               | 25 (4)              | >0.9999              |
| Node                     | 0 (0)                | 6 (1)               | 0.4706               |
| Edema                    | 11 (2)               | 0 (0)               | 0.4866               |
| Warmth                   | 0 (0)                | 6 (1)               | 0.4706               |
| <b>Systemic % (n)</b>    | 44 (8)               | 50 (8)              | >0.9999              |
| Fever                    | 6 (1)                | 6 (1)               | >0.9999              |
| Malaise                  | 17 (3)               | 31 (5)              | 0.4290               |
| Headache                 | 22 (4)               | 13 (2)              | 0.6602               |
| Myalgia                  | 28 (5)               | 6 (1)               | 0.1801               |
| <b><u>Arthralgia</u></b> | <b><u>33 (6)</u></b> | <b><u>0 (0)</u></b> | <b><u>0.0198</u></b> |
| Back pain                | 17 (3)               | 0 (0)               | 0.2299               |
| Diarrhea                 | 6 (1)                | 0 (0)               | >0.9999              |
| Abdominal pain           | 6 (1)                | 6 (1)               | >0.9999              |
| Nausea                   | 11 (2)               | 6 (1)               | >0.9999              |
| Emesis                   | 6 (1)                | 0 (0)               | >0.9999              |
| Pruritus                 | 6 (1)                | 13 (2)              | 0.5909               |
| Dyspnea                  | 0 (0)                | 6 (1)               | 0.4706               |
| Cough                    | 6 (1)                | 6 (1)               | >0.9999              |
| Weakness                 | 22 (4)               | 0 (0)               | 0.1052               |

pSS = patients with primary Sjögren's Syndrome; Non-HCQ = pSS not using hydroxychloroquine; HCQ = pSS using hydroxychloroquine. Comparative analysis was carried out by Chi-square test. In all cases, significant difference was considered at  $p \leq 0.05$  and underscored by bold underlined format.

**Supplementary Table S2.** Serum soluble mediators in patients with primary Sjögren's Syndrome categorized according to the use of HCQ immunotherapy

| Parameters                            | pSS subgroups                  |                                  | <i>p value</i>       |
|---------------------------------------|--------------------------------|----------------------------------|----------------------|
|                                       | Non-HCQ (n=18)<br>Median (IR)  | HCQ (n=16)<br>Median (IR)        |                      |
| CXCL8                                 | 3.5 (2.3-11.3)                 | 8.6 (3.3-56.5)                   | 0.1989               |
| CCL11                                 | 20.8 (16.3-53.3)               | 28.3 (10.3-68.8)                 | 0.6588               |
| CCL3                                  | 1.8 (1.1-2.9)                  | 2.0 (1.4-2.7)                    | 0.6083               |
| CCL4                                  | 61.6 (15.9-118.0)              | 95.9 (12.4-307.4)                | 0.4221               |
| <b><u>CCL2</u></b>                    | <b><u>14.7 (9.5-21.9)</u></b>  | <b><u>31.1 (14.1-53.3)</u></b>   | <b><u>0.0510</u></b> |
| CCL5                                  | 188.4 (180.8-402.9)            | 251.4 (87.2-368.2)               | 0.9809               |
| <b><u>CXCL10</u></b>                  | <b><u>55.6 (33.4-88.4)</u></b> | <b><u>104.3 (51.1-232.4)</u></b> | <b><u>0.0314</u></b> |
| IL-1 $\beta$                          | 0.3 (0.2-0.6)                  | 0.3 (0.2-0.3)                    | 0.4146               |
| <b><u>IL-6</u></b>                    | <b><u>0.1 (0.1-0.3)</u></b>    | <b><u>0.4 (0.2-0.4)</u></b>      | <b><u>0.0378</u></b> |
| TNF- $\alpha$                         | 3.3 (1.7-4.9)                  | 7.3 (1.0-8.9)                    | 0.3661               |
| IL-12                                 | 0.3 (0.2-0.4)                  | 0.3 (0.2-0.5)                    | 0.8953               |
| <b><u>IFN-<math>\gamma</math></u></b> | <b><u>0.6 (0.3-1.1)</u></b>    | <b><u>1.1 (0.8-2.0)</u></b>      | <b><u>0.0208</u></b> |
| IL-15                                 | 44.9 (29.1-68.8)               | 29.1 (27.8-79.2)                 | 0.7500               |
| IL-17                                 | 3.7 (2.4-6.2)                  | 3.3 (2.2-16.9)                   | 0.7398               |
| <b><u>IL-1Ra</u></b>                  | <b><u>44.8 (24.0-66.8)</u></b> | <b><u>107.1 (58.2-295.6)</u></b> | <b><u>0.0058</u></b> |
| IL-4                                  | 0.8 (0.5-1.2)                  | 1.2 (0.5-1.6)                    | 0.4172               |
| IL-5                                  | 6.7 (2.3-10.0)                 | 6.9 (4.0-7.5)                    | 0.9932               |
| <b><u>IL-9</u></b>                    | <b><u>2.8 (2.1-5.3)</u></b>    | <b><u>6.5 (4.0-12.5)</u></b>     | <b><u>0.0302</u></b> |
| <b><u>IL-10</u></b>                   | <b><u>1.7 (1.1-2.2)</u></b>    | <b><u>2.2 (1.5-5.7)</u></b>      | <b><u>0.0509</u></b> |
| IL-13                                 | 0.3 (0.2-0.5)                  | 0.4 (0.2-0.6)                    | 0.5105               |
| FGF-basic                             | 4.3 (2.9-5.5)                  | 5.1 (2.3-8.6)                    | 0.3293               |
| PDGF                                  | 92.6 (42.1-187.1)              | 74.4 (24.5-265.2)                | 0.8592               |
| VEGF                                  | 20.4 (16.3-27.4)               | 18.7 (8.1-33.1)                  | 0.7941               |
| G-CSF                                 | 11.7 (7.0-31.9)                | 21.3 (12.8-28.7)                 | 0.8063               |
| GM-CSF                                | 0.4 (0.2-0.7)                  | 0.5 (0.2-0.9)                    | 0.9144               |
| <b><u>IL-2</u></b>                    | <b><u>0.7 (0.5-1.1)</u></b>    | <b><u>1.3 (0.9-7.3)</u></b>      | <b><u>0.0225</u></b> |
| IL-7                                  | 3.5 (1.3-4.7)                  | 2.6 (1.9-3.6)                    | 0.5728               |

Serum soluble mediators are expressed in median with interquartile range (IR); pSS = patients with primary Sjögren's Syndrome; Non-HCQ = pSS not using hydroxychloroquine; HCQ = pSS using hydroxychloroquine. Comparative analysis was carried out by Mann-Whitney test. In all cases, significant difference was considered at  $p \leq 0.05$  and underscored by bold underlined format.

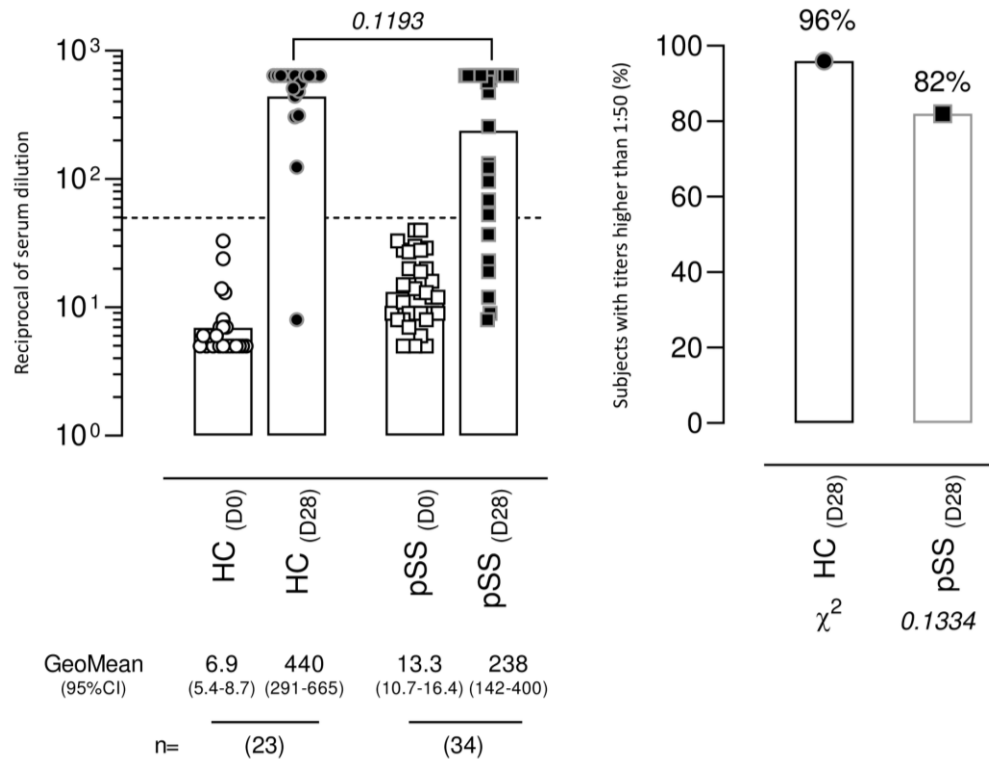

**Supplementary Figure S1.** *Neutralizing antibody titers and viremia according to age in patients with primary Sjögren's Syndrome Upon 17DD-YF Primovaccination categorized according to the use of HCQ immunotherapy.* The YF-specific neutralizing antibodies titers and viremia levels were determined in serum samples from patients with primary Sjögren's Syndrome (pSS), categorized according to the use HCQ immunotherapy, referred as: Non-HCQ (◆, n = 18) or HCQ (▲, n = 16). Correlations analysis between PRNT titers and viremia levels with age was carried out by Spearman rank test and data shown as scattering of individual values. Analysis of cumulative RNAnemia for individual samples along the kinetic timeline according to age was performed by Kolmogorov-Smirnov (KS) test and data shown in line charts. In all cases, significant differences were considered at  $p < 0.05$ . Correlation indices (r score) as well as AUC, X and Y Peaks values are provided in the figure.
